# Supplementary material for: Low Frequency Variants, Collapsed Based on Biological Knowledge, Uncover Complexity of Population Stratification in 1000 Genomes Project Data
Source: PubMed Central journal article supplement (PMC3873241; doi:10.1371/journal.pgen.1003959), 2013-12-26
Supplement: pgen.1003959.s014.pdf [file pgen.1003959.s014.pdf]

| <b>Continental Group</b>      | <b>Population</b> | <b>ABI_SOLID</b> | <b>ILLUMINA</b> | <b>ILLUMINA,LS454</b> | <b>LS454</b> |
|-------------------------------|-------------------|------------------|-----------------|-----------------------|--------------|
| African descent (AFR)         | ASW               | 11               | 50              | 0                     | 0            |
|                               | LWK               | 14               | 83              | 0                     | 0            |
|                               | YRI               | 12               | 76              | 0                     | 0            |
| Asian descent (EAS)           | CHB               | 16               | 81              | 0                     | 0            |
|                               | CHS               | 8                | 92              | 0                     | 0            |
|                               | JPT               | 11               | 78              | 0                     | 0            |
| European descent (EUR)        | CEU               | 0                | 72              | 9                     | 6            |
|                               | FIN               | 18               | 75              | 0                     | 0            |
|                               | GBR               | 19               | 70              | 0                     | 0            |
|                               | TSI               | 0                | 98              | 0                     | 0            |
| Spanish/Mexican descent (AMR) | CLM               | 10               | 50              | 0                     | 0            |
|                               | MXL               | 12               | 54              | 0                     | 0            |
|                               | PUR               | 3                | 52              | 0                     | 0            |
