# Supplementary material for: Low Frequency Variants, Collapsed Based on Biological Knowledge, Uncover Complexity of Population Stratification in 1000 Genomes Project Data
Source: PubMed Central journal article supplement (PMC3873241; doi:10.1371/journal.pgen.1003959), 2013-12-26
Supplement: pgen.1003959.s015.pdf [file pgen.1003959.s015.pdf]

| Natural Selection |               |              |         |                | POP 2   |                |                |           |           |                |                |           |
|-------------------|---------------|--------------|---------|----------------|---------|----------------|----------------|-----------|-----------|----------------|----------------|-----------|
| POP 1             | Source Author | Relevant POP | Genes   | Gene Info      | CHB     |                |                |           | YRI       |                |                |           |
|                   |               |              |         |                | # Loci  | POP 1 Variants | POP 2 Variants | P-value   | # Loci    | POP 1 Variants | POP 2 Variants | P-value   |
| CEU               | M.S.          | EUR          | LCT     | Lactase        | 2258    | 8164           | 17181          | 7.255E-07 | 4133      | 10618          | 34844          | 1.314E-26 |
|                   | J.P.          | EUR          | LCT     |                | 75      | 158            | 1088           | 1         | 185       | 602            | 1129           | 1         |
|                   | P.S.          | EUR          | LCT     |                | 697     | 1413           | 7863           | 1.505E-03 | 1207      | 3064           | 11430          | 4.447E-22 |
|                   | J.P.          | AFR          | ABCC11  | Morpho. Traits | 277     | 3478           | 150            | 1.096E-17 | 303       | 432            | 1420           | 6.173E-10 |
|                   | J.P.          | ASN          | EDAR    |                | 360     | 1524           | 1184           | 2.710E-02 | 574       | 1226           | 4264           | 1.828E-19 |
|                   | P.S.          | ASN          | EDAR    |                | 134     | 4462           | 1216           | 2.432E-26 | 168       | 140            | 766            | 1.388E-14 |
|                   | M.S.          | EUR          | SLC24A5 |                | 987     | 1826           | 6736           | 7.382E-18 | 1604      | 2670           | 10047          | 3.686E-24 |
|                   | J.P.          | ASN          | SLC24A2 | 1042           | 5522    | 3838           | 1              | 1647      | 2777      | 10374          | 1.753E-24      |           |
|                   | J.P.          | EUR          | DUOX2   | Immun. Respns. | 44      | 115            | 75             | 1         | 130       | 86             | 1075           | 2.319E-26 |
|                   | J.P.          | EUR          | ALMS1   | Insulin Reg    | 780     | 8624           | 688            | 5.052E-08 | 1116      | 7977           | 2043           | 2.001E-24 |
|                   | P.S.          | EUR          | ALMS1   |                | 544     | 5734           | 568            | 5.346E-04 | 803       | 1502           | 5947           | 5.060E-23 |
|                   | J.P.          | ASN          | ADH1B   | Metab. Reg.    | 41      | 223            | 190            | 1         | 77        | 167            | 455            | 6.642E-05 |
|                   | J.P.          | EUR          | CPSF3L  | Misc. / Unk.   | 46      | 135            | 241            | 8.589E-01 | 92        | 145            | 688            | 1.274E-16 |
|                   | J.P.          | EUR          | FAIM    |                | 64      | 1250           | 462            | 9.653E-05 | 127       | 249            | 934            | 2.902E-24 |
|                   | M.S.          | ASN          | LIMCH1  |                | 1584    | 7267           | 3567           | 3.297E-06 | 1083      | 2067           | 6123           | 1.059E-20 |
|                   | J.P.          | EUR          | PCGF1   |                | 7       | 8              | 55             | 2.905E-06 | 14        | 8              | 55             | 3.756E-04 |
|                   | J.P.          | AFR          | RNF135  |                | 83      | 183            | 75             | 7.000E-05 | 157       | 284            | 4311           | 2.142E-26 |
|                   | J.P.          | EUR / ASN    | SLC30A9 |                | 323     | 2483           | 525            | 4.786E-11 | 541       | 1464           | 3847           | 1.991E-20 |
|                   | M.S.          | ASN          |         |                | 735     | 9261           | 1204           | 1.547E-10 | 1083      | 4509           | 6435           | 5.799E-02 |
|                   | P.S.          | AFR          |         |                | 112     | 2191           | 253            | 4.786E-11 | 131       | 883            | 458            | 9.199E-09 |
| J.P.              | EUR           | TTC31        |         |                | 29      | 63             | 25             | 1         | 51        | 28             | 303            | 2.072E-18 |
| YRI               | M.S.          | EUR          | LCT     |                | Lactase | 4179           | 26603          | 14402     | 7.397E-12 |                |                |           |
|                   | J.P.          | EUR          | LCT     | 215            |         | 1123           | 1293           | 1         |           |                |                |           |
|                   | P.S.          | EUR          | LCT     | 1247           |         | 7633           | 6310           | 1         |           |                |                |           |
|                   | J.P.          | AFR          | ABCC11  | Morpho. Traits | 420     | 8166           | 306            | 3.249E-18 |           |                |                |           |
|                   | J.P.          | ASN          | EDAR    |                | 601     | 3828           | 1016           | 6.360E-18 |           |                |                |           |
|                   | P.S.          | ASN          | EDAR    |                | 174     | 2916           | 124            | 7.385E-23 |           |                |                |           |
|                   | M.S.          | EUR          | SLC24A5 |                | 1483    | 8190           | 4216           | 2.789E-11 |           |                |                |           |
|                   | J.P.          | ASN          | SLC24A2 | 1729           | 18627   | 4085           | 4.140E-23      |           |           |                |                |           |
|                   | J.P.          | EUR          | DUOX2   | Immun. Respns. | 125     | 1226           | 52             | 3.869E-26 |           |                |                |           |
|                   | J.P.          | EUR          | ALMS1   | Insulin Reg.   | 1239    | 28301          | 1565           | 1.252E-25 |           |                |                |           |
|                   | P.S.          | EUR          | ALMS1   |                | 922     | 19783          | 1311           | 1.248E-25 |           |                |                |           |
|                   | J.P.          | ASN          | ADH1B   | Metab. Reg.    | 62      | 213            | 22             | 1.469E-14 |           |                |                |           |
|                   | J.P.          | EUR          | CPSF3L  | Misc. / Unk.   | 77      | 622            | 223            | 7.590E-08 |           |                |                |           |
|                   | J.P.          | EUR          | FAIM    |                | 130     | 1993           | 396            | 1.784E-24 |           |                |                |           |
|                   | M.S.          | ASN          | LIMCH1  |                | 1095    | 11207          | 1086           | 4.804E-25 |           |                |                |           |
|                   | J.P.          | EUR          | PCGF1   |                | 15      | 55             | 55             | 1         |           |                |                |           |
|                   | J.P.          | AFR          | RNF135  |                | 146     | 4112           | 172            | 3.003E-25 |           |                |                |           |
|                   | J.P.          | EUR / ASN    | SLC30A9 |                | 568     | 6538           | 1023           | 2.897E-24 |           |                |                |           |
|                   | M.S.          | ASN          |         |                | 1301    | 27895          | 7627           | 1.388E-25 |           |                |                |           |
|                   | P.S.          | AFR          |         |                | 194     | 6665           | 1947           | 8.165E-23 |           |                |                |           |
| J.P.              | EUR           | TTC31        |         |                | 55      | 483            | 25             | 1.853E-17 |           |                |                |           |
