# Supplementary material for: Low Frequency Variants, Collapsed Based on Biological Knowledge, Uncover Complexity of Population Stratification in 1000 Genomes Project Data
Source: PubMed Central journal article supplement (PMC3873241; doi:10.1371/journal.pgen.1003959), 2013-12-26
Supplement: pgen.1003959.s016.pdf [file pgen.1003959.s016.pdf]

|       | POP 2 | CHB     |                |                |           | YRI     |                |                |           |
|-------|-------|---------|----------------|----------------|-----------|---------|----------------|----------------|-----------|
| POP 1 |       | N. Loci | POP 1 Variants | POP 2 Variants | P-value   | N. Loci | POP 1 Variants | POP 2 Variants | P-value   |
| CEU   | LCT   | 140     | 114            | 1030           | 4.239E-10 | 213     | 143            | 1799           | 1.026E-22 |
|       | PAH   | 246     | 1520           | 168            | 2.008E-07 | 492     | 1670           | 2737           | 1         |
|       | CTCF  | 225     | 836            | 207            | 8.828E-05 | 323     | 801            | 2412           | 4.129E-04 |
|       | CFTR  | 487     | 3340           | 428            | 4.536E-11 | 731     | 1737           | 4355           | 1.659E-16 |
| YRI   | LCT   | 214     | 1424           | 788            | 5.875E-01 |         |                |                |           |
|       | PAH   | 530     | 4764           | 2892           | 2.099E-05 |         |                |                |           |
|       | CTCF  | 311     | 3700           | 429            | 2.081E-21 |         |                |                |           |
|       | CFTR  | 792     | 7396           | 1544           | 4.995E-23 |         |                |                |           |
