# Supplementary material for: Low Frequency Variants, Collapsed Based on Biological Knowledge, Uncover Complexity of Population Stratification in 1000 Genomes Project Data
Source: PubMed Central journal article supplement (PMC3873241; doi:10.1371/journal.pgen.1003959), 2013-12-26
Supplement: pgen.1003959.s017.pdf [file pgen.1003959.s017.pdf]

| <b>Example</b> | <b>POP</b> | <b>Minor Allele</b> | <b>Major Allele</b> | <b>Group A</b> | <b>RCC ON</b> | <b>OMA ON</b> | <b>Minor Allele</b> | <b>Group A MAF</b> | <b>Low frequency (0.05)</b> | <b>Bin Count (GroupA)</b> | <b>Bin Count (GroupB)</b> |
|----------------|------------|---------------------|---------------------|----------------|---------------|---------------|---------------------|--------------------|-----------------------------|---------------------------|---------------------------|
| A              | CEU<br>YRI | T: 60<br>A: 10      | A: 140<br>T: 190    | CEU            | NO            | NO            | T                   | 0.3                | NO                          |                           |                           |
| B              | CEU<br>YRI | T: 60<br>A: 10      | A: 140<br>T: 190    | YRI            | NO            | NO            | A                   | 0.05               | YES                         | 10                        | 140                       |
| C              | CEU<br>YRI | T: 60<br>A: 10      | A: 140<br>T: 190    | CEU            | YES           | NO            | T                   | 0.3                | YES                         | 60                        | 190                       |
| D              | CEU<br>YRI | T: 60<br>A: 10      | A: 140<br>T: 190    | YRI            | YES           | NO            | A                   | 0.05               | YES                         | 10                        | 140                       |
| E              | CEU<br>YRI | T: 60<br>A: 10      | A: 140<br>T: 190    | CEU            | NO            | YES           | A                   | 0.7                | NO                          |                           |                           |
| F              | CEU<br>YRI | T: 60<br>A: 10      | A: 140<br>T: 190    | YRI            | NO            | YES           | A                   | 0.05               | YES                         | 10                        | 140                       |
| G              | CEU<br>YRI | T: 60<br>A: 10      | A: 140<br>T: 190    | CEU            | YES           | YES           | A                   | 0.7                | YES                         | 140                       | 10                        |
| H              | CEU<br>YRI | T: 60<br>A: 10      | A: 140<br>T: 190    | YRI            | YES           | YES           | A                   | 0.05               | YES                         | 10                        | 140                       |
