# Supplementary material for: Low Frequency Variants, Collapsed Based on Biological Knowledge, Uncover Complexity of Population Stratification in 1000 Genomes Project Data
Source: PubMed Central journal article supplement (PMC3873241; doi:10.1371/journal.pgen.1003959), 2013-12-26
Supplement: pgen.1003959.s018.pdf [file pgen.1003959.s018.pdf]

| <b>Chrom</b> | <b>ID</b>    | <b>Start(bp)</b> | <b>Stop(bp)</b> |
|--------------|--------------|------------------|-----------------|
| chr1         | CMS_EUR:reg1 | 1490074          | 1509034         |
| chr1         | CMS_ASN:reg2 | 16414784         | 16417992        |
| chr1         | CMS_AFR:reg3 | 26917014         | 26936774        |
| chr1         | CMS_EUR:reg4 | 30707291         | 30724056        |
