# Supplementary material for: Low Frequency Variants, Collapsed Based on Biological Knowledge, Uncover Complexity of Population Stratification in 1000 Genomes Project Data
Source: PubMed Central journal article supplement (PMC3873241; doi:10.1371/journal.pgen.1003959), 2013-12-26
Supplement: pgen.1003959.s019.pdf [file pgen.1003959.s019.pdf]

| <b>Sample Size</b> | <b>Type I Error Rate</b> | <b>Power</b> |
|--------------------|--------------------------|--------------|
| 2000               | 0.0538                   | 0.9910       |
| 1000               | 0.0495                   | 0.9340       |
| 500                | 0.0550                   | 0.7575       |
| 250                | 0.0545                   | 0.5030       |
